# Supplementary material for: Nonstoichiometric Bi2O3: efficient visible light photocatalyst
Source: Royal Society of Chemistry journal article supplement (doi:10.1039/c2ra22239f), 2012-11-29
Supplement: c2ra22239f.pdf [file c2ra22239f.pdf]

## SUPPORTING INFORMATION

### **Nonstoichiometric Bi<sub>2</sub>O<sub>3</sub>: Efficient Visible Light Photocatalyst**

Shamaila Sajjad <sup>a,b\*</sup>, Sajjad A. K. Leghari<sup>a</sup>, Jinlong Zhang<sup>a</sup>

<sup>a</sup>Key Laboratory for Advanced Materials and Institute of Fine Chemicals, East China  
University of Science and Technology, 130 Meilong Road, Shanghai 200237, P.R.  
China.

<sup>b</sup>International Islamic University, H-10, Islamabad, Pakistan

E-mail: shalisajjad@hotmail.com

## **Experimental:**

**Experimental Approach:** The pure Bi<sub>2</sub>O<sub>3</sub> (Aldrich) (99.9%) with greenish yellow colour was treated in vacuum for 3h at 197.7 °C. The vacuum treatment of pure Bi<sub>2</sub>O<sub>3</sub> for 3h at 197.7 °C is optimized according to different timings and temperature conditions. The vacuum oven (DZF-6020) is manufactured by Shanghai Hua-Lion equipment Co. Ltd. After this treatment, the color of the sample changed from greenish yellow to dark brown, which results in the formation of a new composite in the form of Bi<sub>2</sub>O<sub>3</sub>/ Bi<sub>2</sub>O<sub>3+x</sub>.

## **Catalyst Characterizations:**

### **X-ray diffraction (XRD) analysis**

The crystal phase composition and crystallinity of the obtained powder was determined by X-ray diffractometry (XRD) with Rigaku D/Max 2550 VB/PC apparatus (Cu K $\alpha$  1 radiation,  $\lambda = 0.154056\text{nm}$ ) at room temperature operated at 40 kV and 100 mA. Diffraction patterns were recorded in the angular range of 20°-80°. The crystallite size was estimated by applying the Scherer equation to the full width at half-maximum (fwhm) of the (120) peak at  $2\theta = 27.4^\circ$  of  $\alpha\text{-Bi}_2\text{O}_3$ :

$$D = K\lambda/\beta\cos\theta$$

where  $\beta$  is the half-height width of the diffraction peak (FWHM),  $K = 0.89$  is a coefficient,  $\theta$  is the diffraction angle, and  $\lambda$  is the X-ray wavelength corresponding to the Cu  $K_{\alpha}$  radiation.  $D$  is the average crystallite size of the powder sample in nanometer.

### **UV-vis diffuse reflectance spectra (DRS)**

The UV-vis DRS spectra were obtained for the dry-pressed disk samples using a Scan UV-vis spectrophotometer (Varian, Cary 500, double beam spectrophotometer) equipped with an integrating sphere assembly, using  $\text{BaSO}_4$  as the reflectance sample. The spectra were recorded at room temperature in air within the range 200-800 nm.

### **Raman spectra**

Raman spectra of the samples were recorded by Renishaw inVia Raman spectrometer at room temperature with the excitation wavelength of 785 nm.

### **Thermogravimetric analysis (TGA)**

Thermo gravimetric analysis (TGA) was performed on the Perkin-Elmer Pyris Diamond thermo gravimetric analyzer. TGA trace for the pure and vacuum treated samples was carried out at a heating rate of  $10\text{ }^{\circ}\text{C}/\text{min}$  from  $40\text{ }^{\circ}\text{C}$  to  $800\text{ }^{\circ}\text{C}$  in air.

### **Photoluminescence spectra (PLS)**

Photoluminescence spectra were recorded by Varian Cary Eclipse Fluorescence spectrophotometer under the excitation light at 270 nm. The PL spectra of all samples were examined in the wavelength range of 300-800 nm.

### **X-ray photoelectron spectroscopy (XPS)**

The instrument employed for XPS study was a Perkin-Elmer PHI 5000C ESCA System with Al K<sub>α</sub> radiation operated at 250 W. Extended spectra were collected in the range 0-1000 eV. Detailed spectra were recorded for the following regions: C1s, Bi4f and O1s. The standard deviation in the BE values is ±0.05 eV. The raw spectra were fitted using a non-linear least-square fitting program adopting Gaussian-Lorentzian peak shapes for the peaks. In order to correct for charging effects, the BE values were referred to the C1s peak at 284.6 eV.

### **BET surface area analysis**

Nitrogen adsorption and desorption isotherms were obtained at 77 K with a Micromeritics ASAP 2010 system. All the samples were degassed at 473 K before the measurement.

### **Electron paramagnetic resonance spectroscopy (EPR)**

The electron paramagnetic resonance (EPR) spectra were recorded at 298 K using a Bruker EMX-8/2.7 EPR spectrometer operating at the X band and magnetic field modulation of 100 kHz, with a microwave power of 20.502 mW and modulation amplitude of 4.00 G. The microwave frequency of 9.86 GHz was read with a frequency counter.

### **Measurement of photocatalytic activity.**

To evaluate the photocatalytic activities of these materials under visible light ( $\lambda > 420$  nm), oxidative decompositions of methylene blue (MB), methyl orange (MO) and nitro-phenol (NP) were tested. The 1000-Watt high-pressure W lamp was used as a visible light source mounted 10 cm away from the reaction solution. The short-wavelength components ( $\lambda < 420$  nm) of the light were cut off using a cut-off glass filter. During the reaction, a water-cooling system cooled the water-jacketed photochemical reactor to maintain the solution at room temperature. The photocatalyst (0.05 g) was added into a 100 mL quartz photoreactor containing 50 mL of  $10 \text{ mgL}^{-1}$  aqueous solution of NP, MO and MB. The mixture was sonicated for 20 min and stirred for 30 min in the dark in order to reach the adsorption–desorption equilibrium. Preliminary studies indicated a linear light absorbance verse pollutant's concentration and that the decomposition of pollutant in the absence of photocatalyst or irradiation could be neglected. The reproducibility was checked by repeating the measurements at least three times and was found to be within the acceptable limit ( $\pm 3 \%$ ). To analyze the concentration of organics, the suspension was first centrifuged and filtered through  $0.22 \mu\text{m}$  Millipore membrane filters to remove the catalyst. The concentration of organics was measured with a UV–vis spectrophotometer (Varian Cary 100). The MB, MO and NP showed its main absorbance peak at 663, 465 and 273 nm, respectively.

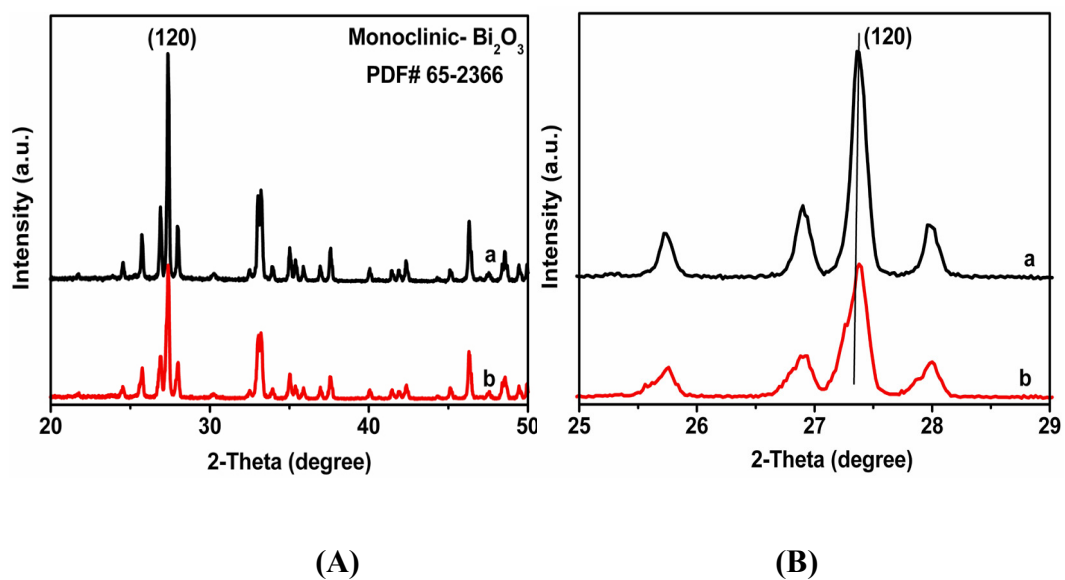

**Figure S1.** X-ray diffraction patterns of (a) pure  $\text{Bi}_2\text{O}_3$ ; (b)  $\text{Bi}_2\text{O}_3/\text{Bi}_2\text{O}_{3+x}$  composite.

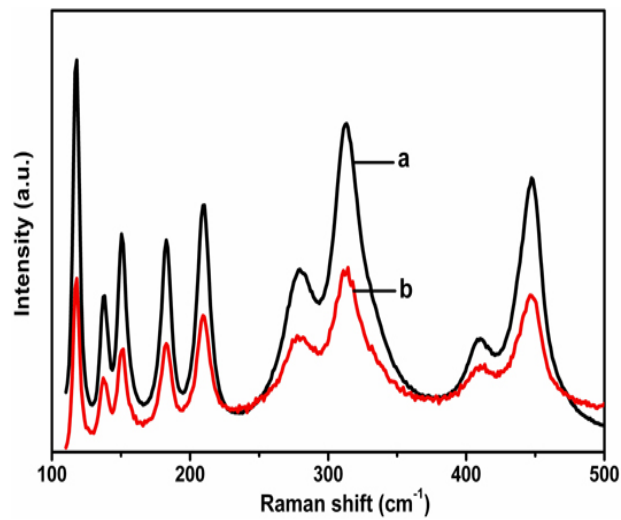

**Figure S2.** Raman spectra of (a) pure Bi<sub>2</sub>O<sub>3</sub>; (b) Bi<sub>2</sub>O<sub>3</sub>/Bi<sub>2</sub>O<sub>3+x</sub> composite.

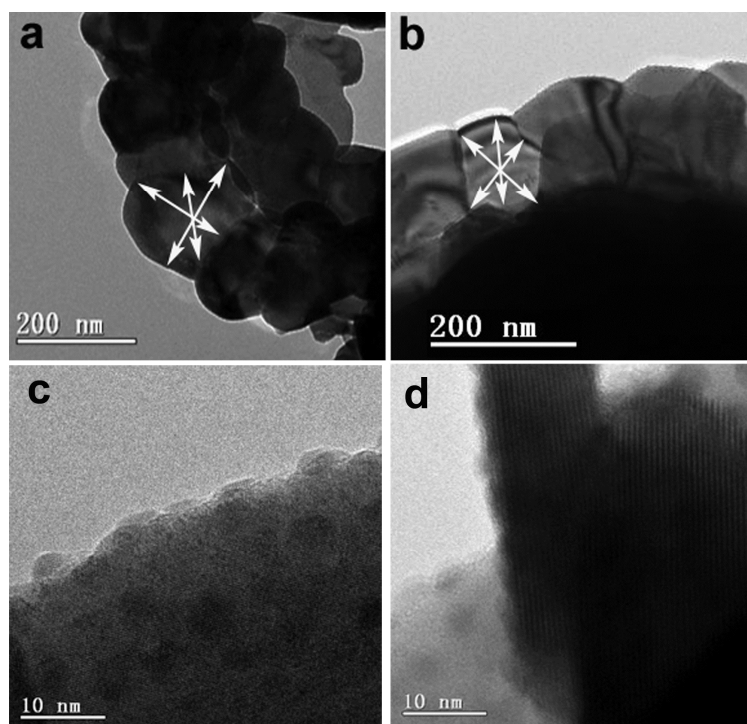

**Figure S3.** TEM and HRTEM images of (a) pure  $\text{Bi}_2\text{O}_3$ ; (b)  $\text{Bi}_2\text{O}_3/\text{Bi}_2\text{O}_{3+x}$  composite; (c) pure  $\text{Bi}_2\text{O}_3$ ; (d)  $\text{Bi}_2\text{O}_3/\text{Bi}_2\text{O}_{3+x}$  composite.



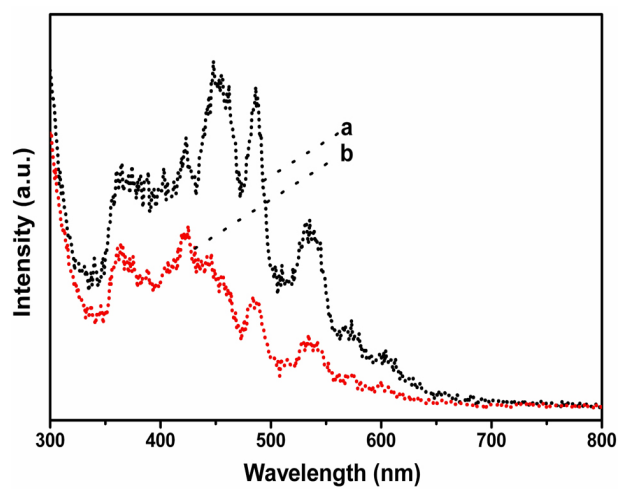

**Figure S4.** Photoluminescence spectra of (a) pure Bi<sub>2</sub>O<sub>3</sub>; (b) Bi<sub>2</sub>O<sub>3</sub>/Bi<sub>2</sub>O<sub>3+x</sub> composite.

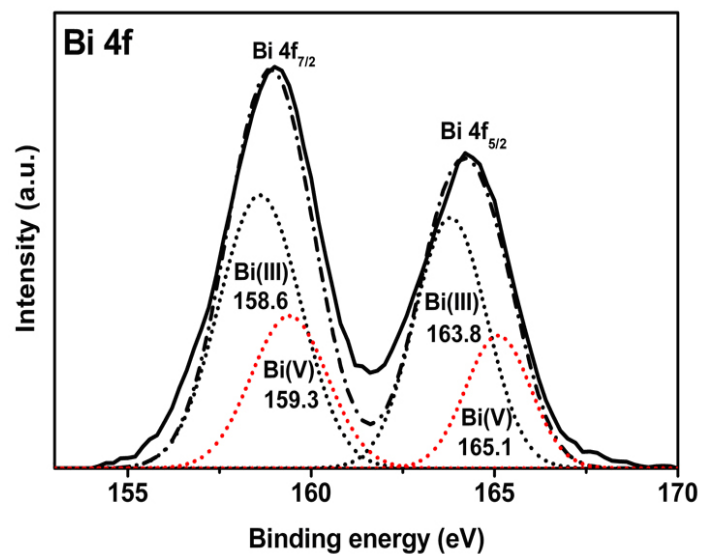

**Figure S5.** Deconvolution peaks of Bi 4f region of Bi<sub>2</sub>O<sub>3</sub>/Bi<sub>2</sub>O<sub>3+x</sub> composite

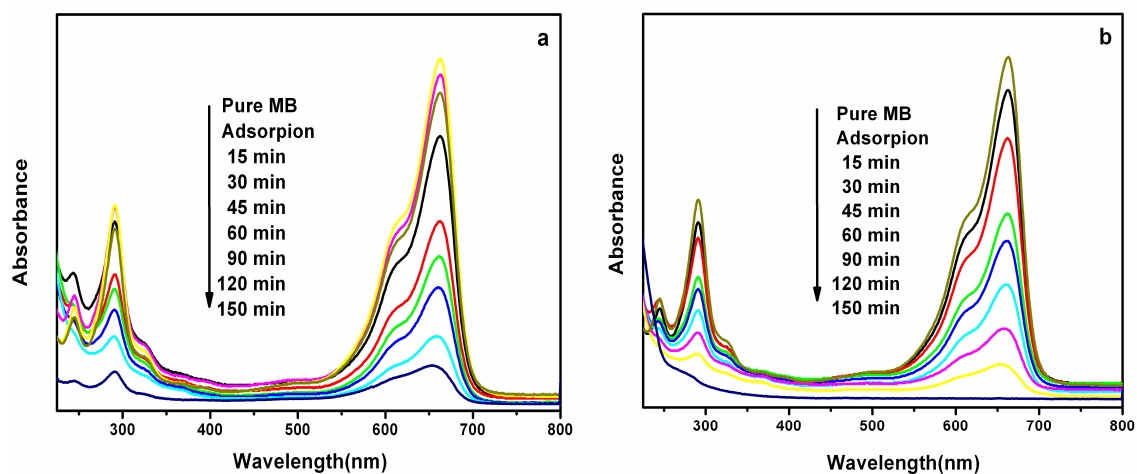

**Figure S6.** Degradation profile of methylene blue over (a) pure  $\text{Bi}_2\text{O}_3$ ; (b)  $\text{Bi}_2\text{O}_3/\text{Bi}_2\text{O}_{3+x}$  composite.

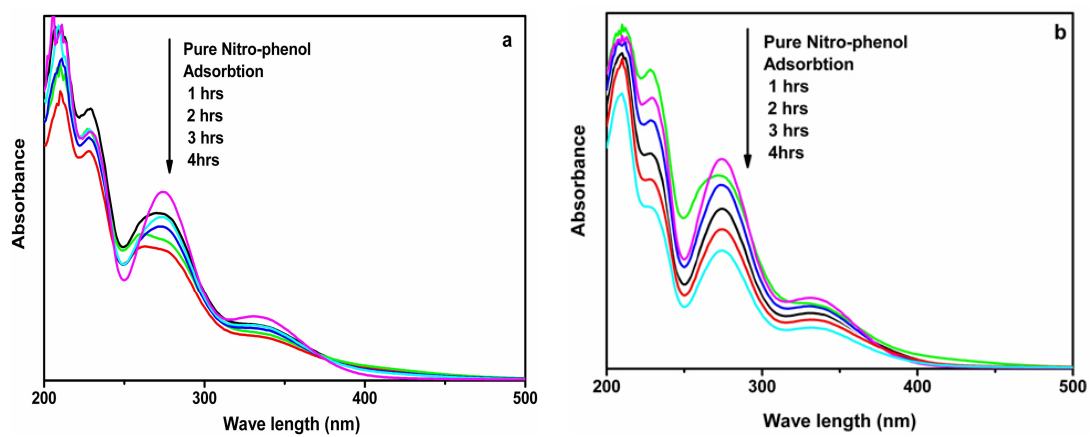

**Figure S7.** Degradation profile of nitro-phenol over (a) pure Bi<sub>2</sub>O<sub>3</sub>; (b) Bi<sub>2</sub>O<sub>3</sub>/Bi<sub>2</sub>O<sub>3+x</sub> composite.

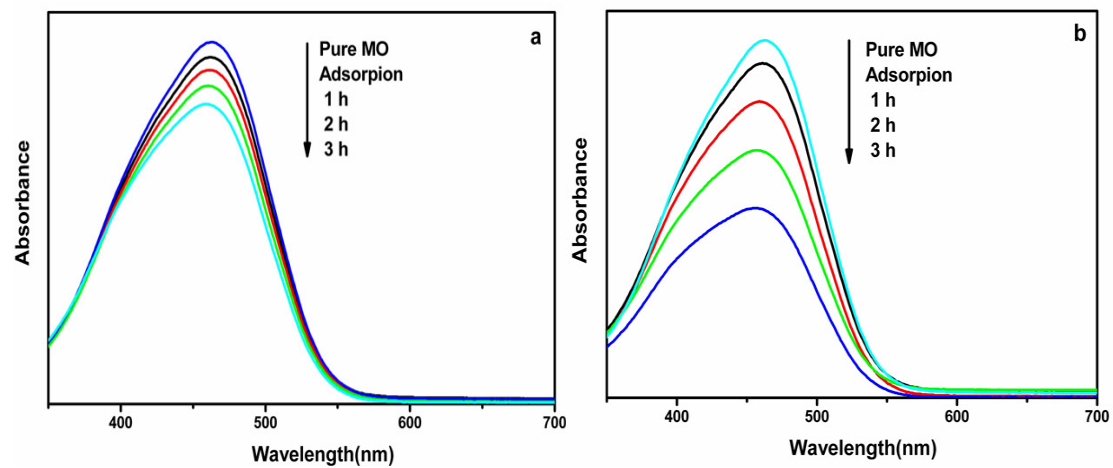

**Figure S8.** Degradation profile of methyl orange over (a) pure  $\text{Bi}_2\text{O}_3$ ; (b)  $\text{Bi}_2\text{O}_3/\text{Bi}_2\text{O}_{3+x}$  composite.

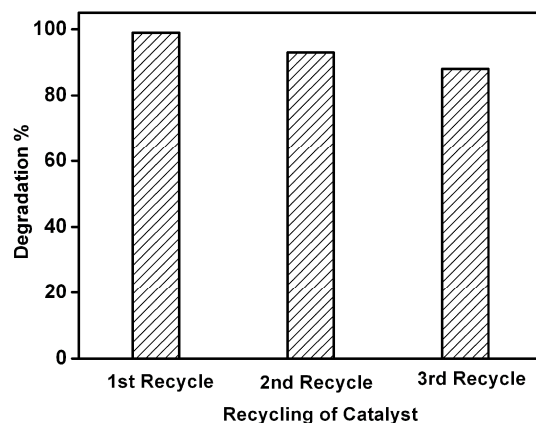

**Figure S9.** Recycling of  $\text{Bi}_2\text{O}_3/\text{Bi}_2\text{O}_{3+x}$  composite for the photo catalytic degradation of MO for 6 h visible light reaction illustrating photo stability.

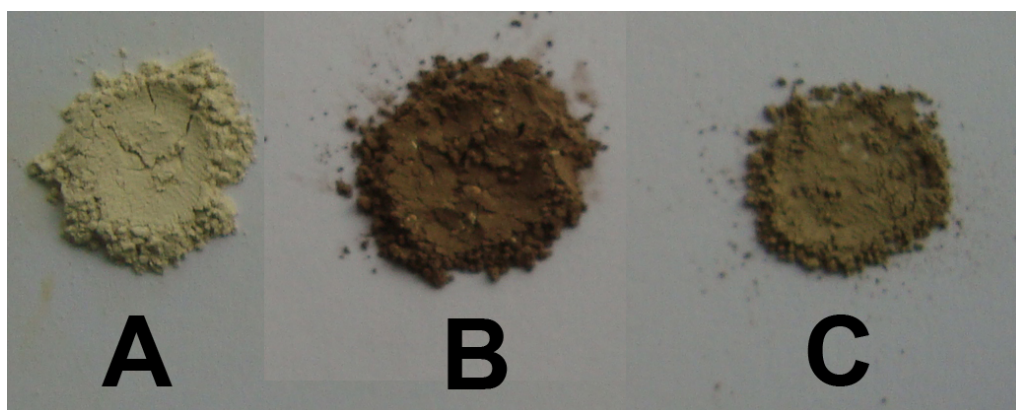

**Figure S10.** Photo graphs of pure  $\text{Bi}_2\text{O}_3$ ,  $\text{Bi}_2\text{O}_3/\text{Bi}_2\text{O}_{3+x}$  composite and  $\text{Bi}_2\text{O}_3/\text{Bi}_2\text{O}_{3+x}$  composite after the photo catalytic degradation of MO for 6 h visible light reaction illustrating photo stability.

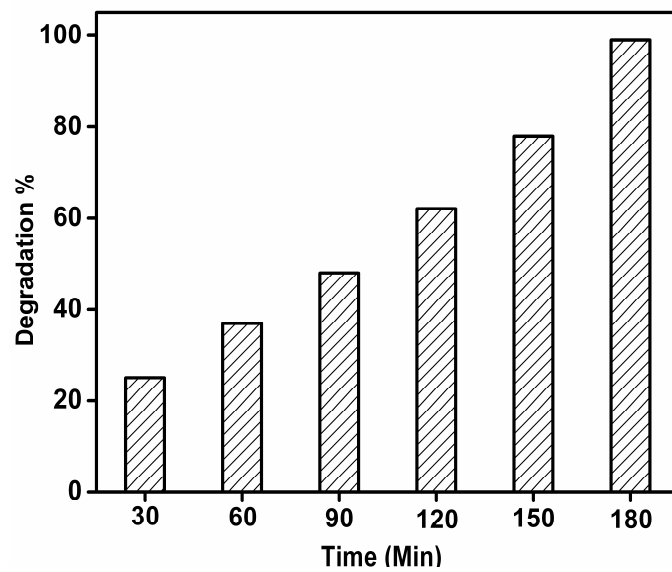

**Figure S11.** Photocatalytic degradation % of MO via  $\text{Bi}_2\text{O}_3/\text{Bi}_2\text{O}_{3+x}$  vacuum activated composite at different vacuum treatment timings.

**Table S1:** XRD parameters and crystallite sizes

| Samples                                    | 2( $\theta$ ) | FWHM  | d(A)   | Crystallite size<br>(nm) | BET area<br>(m <sup>2</sup> g <sup>-1</sup> ) |
|--------------------------------------------|---------------|-------|--------|--------------------------|-----------------------------------------------|
| Pure Bi <sub>2</sub> O <sub>3</sub>        | 27.36         | 0.178 | 3.2501 | 105.40                   | 0.57                                          |
| Vac treated Bi <sub>2</sub> O <sub>3</sub> | 27.42         | 0.234 | 3.2570 | 62.32                    | 0.74                                          |
